# Supplementary material for: Quantifying H 2 S with a Picarro CRDS G2201-i and the effect of H 2 S on carbon isotopes
Source: Copernicus journal article supplement (doi:10.5194/amt-2023-265), 2024-02-01
Supplement: Supplementary file 1 [file amt-2023-265-supplement.pdf]

## 1 Supplemental Materials

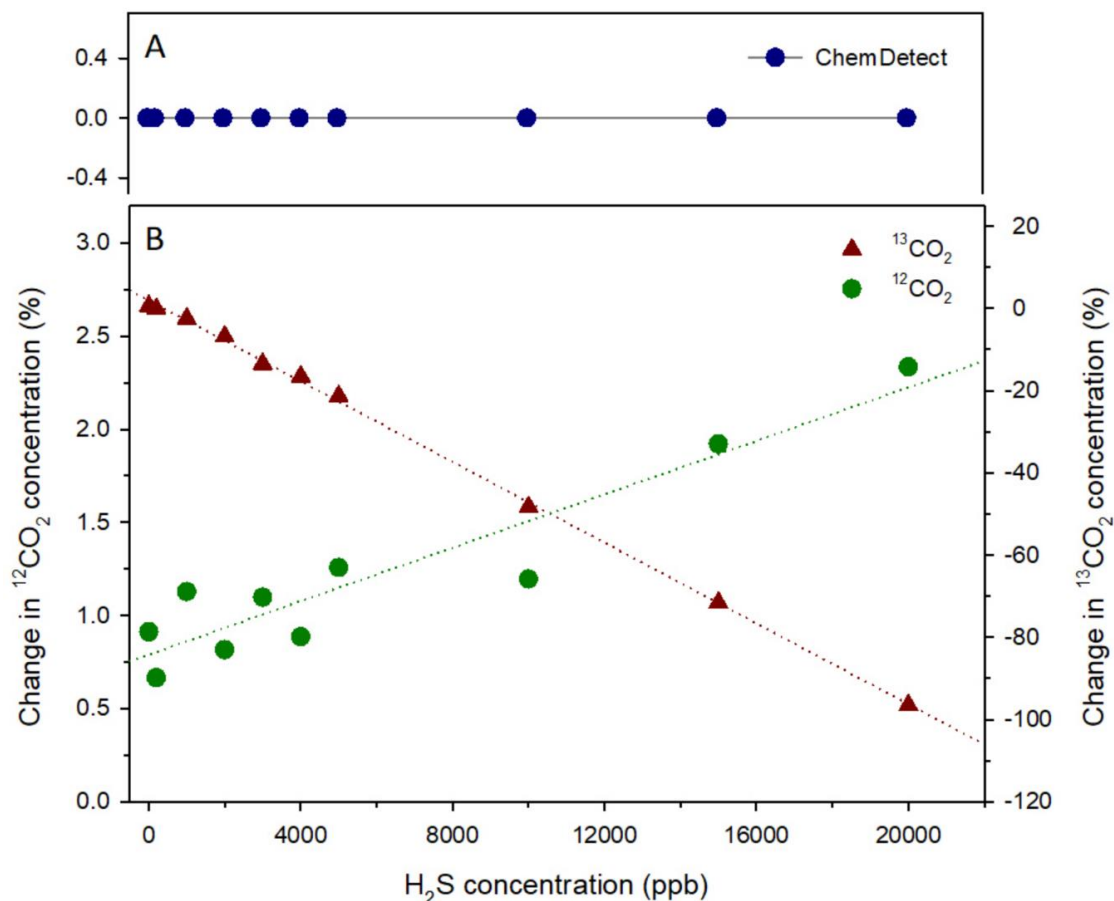

2

3 Figure S1. A) The feature “Chemdetect” does not show the presence of H<sub>2</sub>S as an interference. B) Percentage  
4 change in the <sup>12</sup>CO<sub>2</sub> and <sup>13</sup>CO<sub>2</sub> concentrations when increasing the H<sub>2</sub>S concentrations. The percentage change was  
5 calculated between the gas mixtures with H<sub>2</sub>S and the gas mixtures without H<sub>2</sub>S when the H<sub>2</sub>S was scrubbed using  
6 a copper tube.

7 Chemdetect

8 Chemdetect is a feature for newer versions of the Picarro instruments that is supposed to  
9 detect the presence of interferences in the measurements. Chemdetect values of 0 mean no  
10 interferences while values of 1 indicate the presence of an interferent. During the experiments  
11 conducted in this study, the Chemdetect value was always zero, meaning that there was no

12 interference detected by this feature. The results of Chemdetect are shown in Figure S1 when  
13 adding H<sub>2</sub>S to the 995 CO<sub>2</sub> standard. The Chemdetect results did not change even though H<sub>2</sub>S was  
14 present and was producing an effect on the other measurements. Therefore, we conclude that the  
15 Chemdetect feature is not sensitive to the presence of H<sub>2</sub>S.

A)

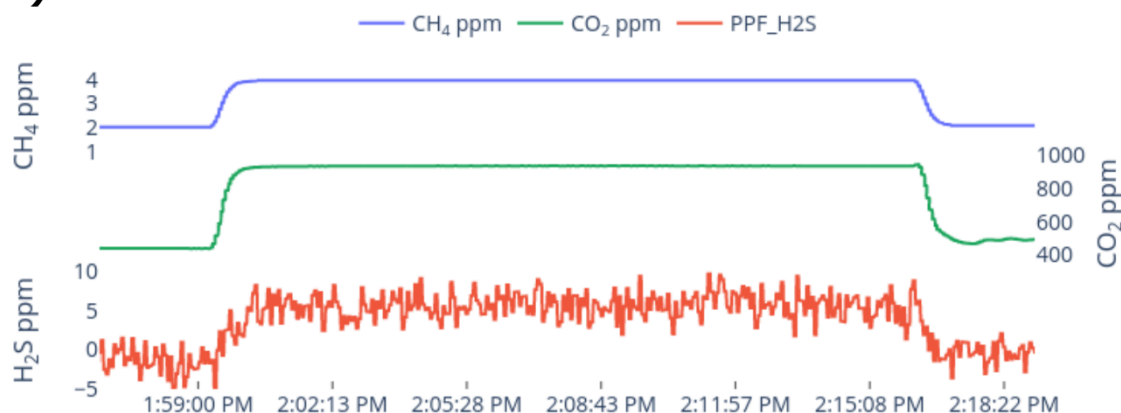

B)

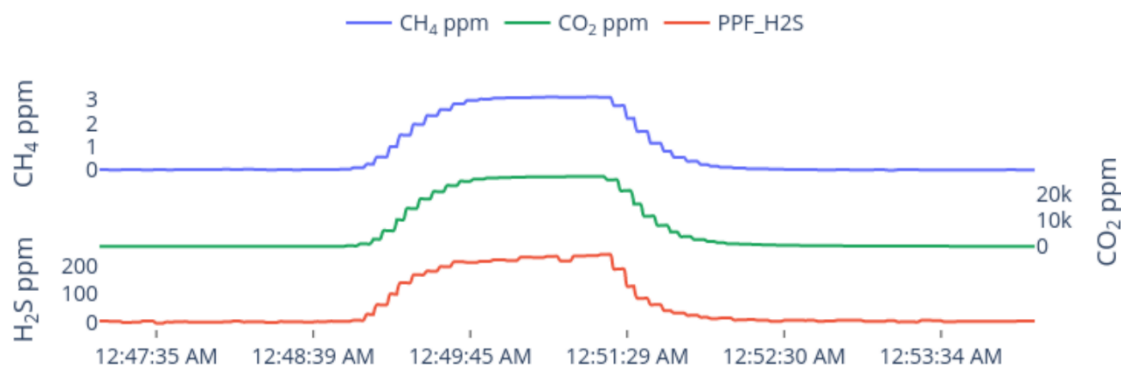

16 **Figure S2. Time series of raw concentrations from the Picarro instrument data processing package. A) Time series**  
17 **of a 15-minute laboratory experiment measuring a gas mixture of the 995 ppm ± 20 ppm CO<sub>2</sub> standard spiked with**  
18 **~ 5 ppm H<sub>2</sub>S. The 995 ppm CO<sub>2</sub> standard has a known CH<sub>4</sub> concentration of ~ 4 ppm. The PPF\_H<sub>2</sub>S signal is noisy**  
19 **in low concentrations B) Time series of ~ 2-minute laboratory experiments measuring the natural gas sample. Due**  
20 **to the high concentrations, the experiment was ended within 2 minutes to avoid compromising the functionality of**  
21 **the instrument. The response time of the three gases of interest appear identical at low and high concentrations.**

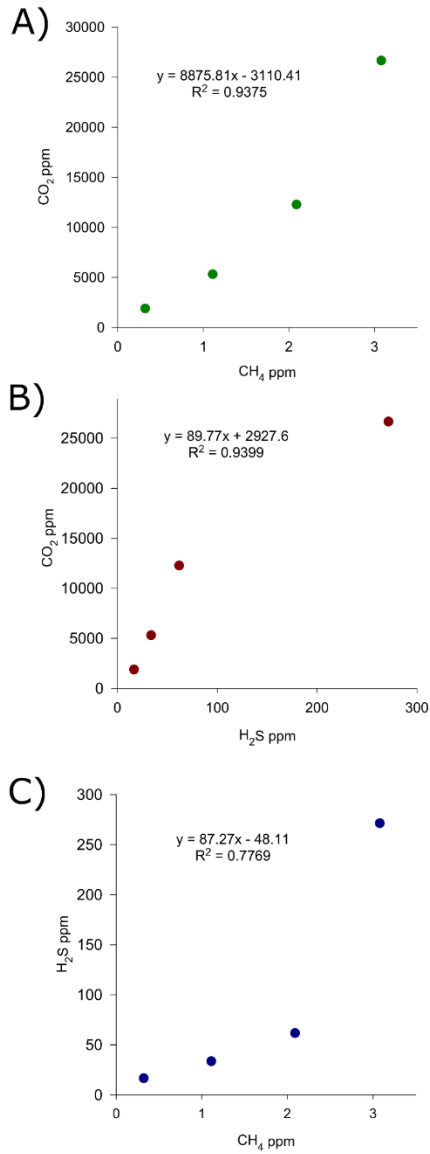

22

23 **Figure S3. Gas ratios of natural samples calculated with the Picarro G2201-i. A) Correlation plot between CO<sub>2</sub> and**  
 24 **CH<sub>4</sub>. B) Correlation plot between CO<sub>2</sub> and H<sub>2</sub>S. C) Correlation plot between H<sub>2</sub>S and CH<sub>4</sub>. The slopes and R<sup>2</sup>**  
 25 **values of these trendlines are also detailed in Table 1.**
